# Supplementary material for: Macrocycle-assisted synthesis of non-stoichiometric silver(i) halide electrocatalysts for efficient chlorine evolution reaction
Source: PubMed Central journal article supplement — Chem Sci. 2017 Jun 9;8(8):5662–8. doi: 10.1039/c7sc00575j (PMC5620993; doi:10.1039/c7sc00575j), 2017-06-09
Supplement: SC-008-C7SC00575J-s001.pdf [file SC-008-C7SC00575J-s001.pdf]

## Supporting Information

### **Macrocycle-assisted synthesis of non-stoichiometric silver(I) halide electrocatalysts for efficient chlorine evolution reaction**

Qiong-You Zhang, Xin He, and Liang Zhao\*

The Key Laboratory of Bioorganic Phosphorus Chemistry & Chemical Biology (Ministry of Education), Department of Chemistry, Tsinghua University, Beijing 100084, China

[zhaolchem@mail.tsinghua.edu.cn](mailto:zhaolchem@mail.tsinghua.edu.cn)

### X-ray Crystallographic Analysis

Crystal data for  $[\text{Ag}_4\text{Cl}(\text{CF}_3\text{SO}_3)_3(\text{Py}[7])](\text{CH}_3\text{OH})$  (**1**, CCDC-1527294):  $\text{C}_{46}\text{H}_{46}\text{Ag}_4\text{ClF}_9\text{N}_{14}\text{O}_{10}\text{S}_3$ ,  $M = 1689.08$ , monoclinic, space group  $P2_1/n$  (No. 14),  $a = 24.864(5) \text{ \AA}$ ,  $b = 10.112(2) \text{ \AA}$ ,  $c = 24.940(5) \text{ \AA}$ ,  $\beta = 114.19(3)^\circ$ ,  $V = 5720(2) \text{ \AA}^3$ ,  $Z = 4$ ,  $T = 173 \text{ K}$ ,  $D_c = 1.961 \text{ g cm}^{-3}$ . The structure, refined on  $F^2$ , converged for 9994 unique reflections ( $R_{\text{int}} = 0.0643$ ) and 8482 observed reflections with  $I > 2\sigma(I)$  to give  $R_1 = 0.0962$  and  $wR_2 = 0.1894$  and a goodness-of-fit = 1.225. Silver atom Ag2 is disordered at two separated positions with a refined occupancy ratio of 0.89:0.11.

Crystal data for  $[\text{Ag}_5\text{Br}(\text{CF}_3\text{SO}_3)_2(\text{H}_2\text{O})_4(\text{Py}[7])](\text{CF}_3\text{SO}_3)_2 \cdot \text{H}_2\text{O}$  (**2**, CCDC-1527295):  $\text{C}_{46}\text{H}_{52}\text{Ag}_5\text{BrF}_{12}\text{N}_{14}\text{O}_{17}\text{S}_4$ ,  $M = 2048.52$ , triclinic, space group  $P-1$  (No. 2),  $a = 10.277(2) \text{ \AA}$ ,  $b = 17.015(3) \text{ \AA}$ ,  $c = 19.143(4) \text{ \AA}$ ,  $\alpha = 91.21(3)^\circ$ ,  $\beta = 102.96(3)^\circ$ ,  $\gamma = 90.15(3)^\circ$ ,  $V = 3261.4(11) \text{ \AA}^3$ ,  $Z = 2$ ,  $T = 173 \text{ K}$ ,  $D_c = 2.086 \text{ g cm}^{-3}$ . The structure, refined on  $F^2$ , converged for 14837 unique reflections ( $R_{\text{int}} = 0.0442$ ) and 13437 observed reflections with  $I > 2\sigma(I)$  to give  $R_1 = 0.0442$  and  $wR_2 = 0.1083$  and a goodness-of-fit = 1.068. Silver atom Ag2 is disordered at two positions with a refined occupancy ratio of 0.70:0.30. The triflate anion S4 has two orientational disorder positions with a refined occupancy ratio of 0.72:0.28.

Crystal data for  $[\text{Ag}_4\text{I}(\text{H}_2\text{O})_2(\text{Py}[7])](\text{CF}_3\text{SO}_3)_3$  (**3**, CCDC-1527296):  $\text{C}_{45}\text{H}_{42}\text{Ag}_4\text{F}_9\text{IN}_{14}\text{O}_{10}\text{S}_3$ ,  $M = 1764.49$ , orthorhombic, space group  $Pnma$  (No. 62),  $a = 26.256(5) \text{ \AA}$ ,  $b = 21.160(4) \text{ \AA}$ ,  $c = 10.086(2) \text{ \AA}$ ,  $V = 5603.6(19) \text{ \AA}^3$ ,  $Z = 4$ ,  $T = 173 \text{ K}$ ,  $D_c = 2.092 \text{ g cm}^{-3}$ . The structure, refined on  $F^2$ , converged for 5068 unique reflections ( $R_{\text{int}} = 0.0646$ ) and 4328 observed reflections with  $I > 2\sigma(I)$  to give  $R_1 = 0.0835$  and  $wR_2 = 0.1439$  and a goodness-of-fit = 1.209. Silver atom Ag3 is disordered at three separated positions with a refined occupancy ratio of 0.36:0.32:0.32. The triflate anion S2 has two orientational disorder positions with a refined occupancy ratio of 0.52:0.48. A disordered atom C24 was refined isotropically.

## Supporting Figures

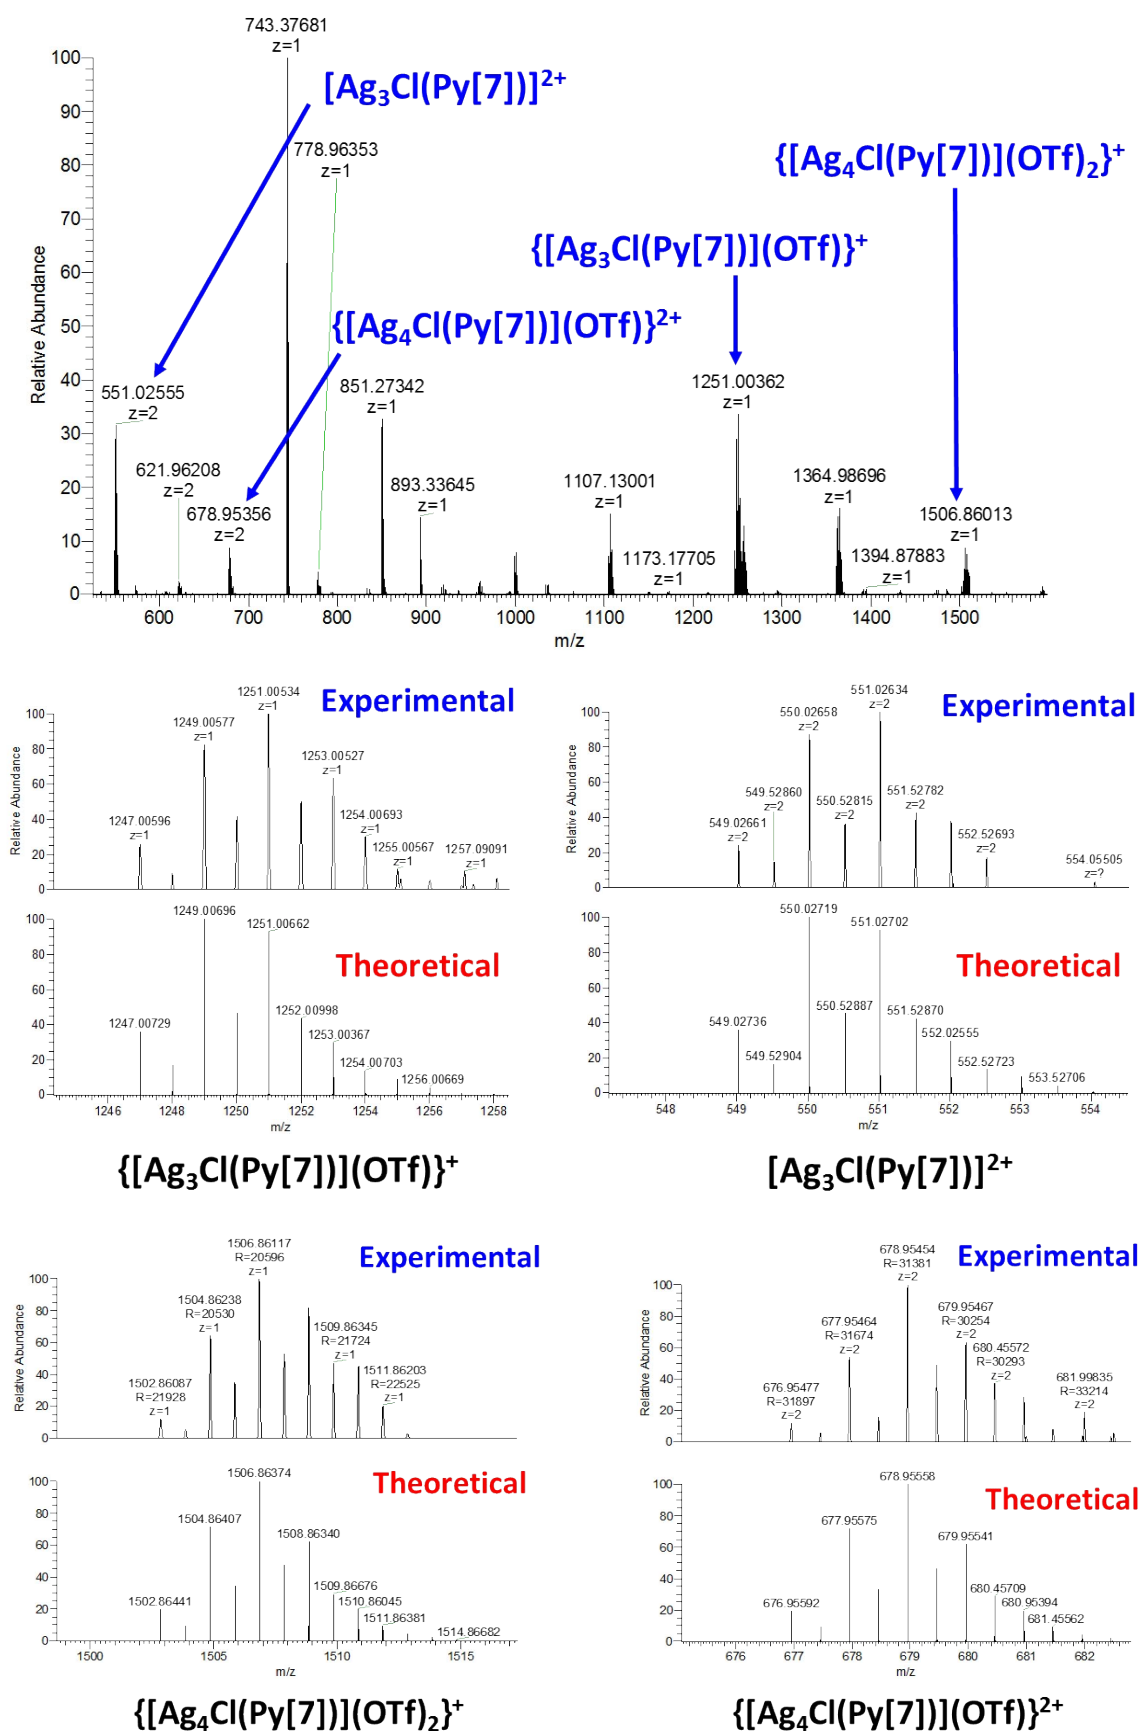

Fig. S1 High resolution ESI-MS spectra of complex 1.

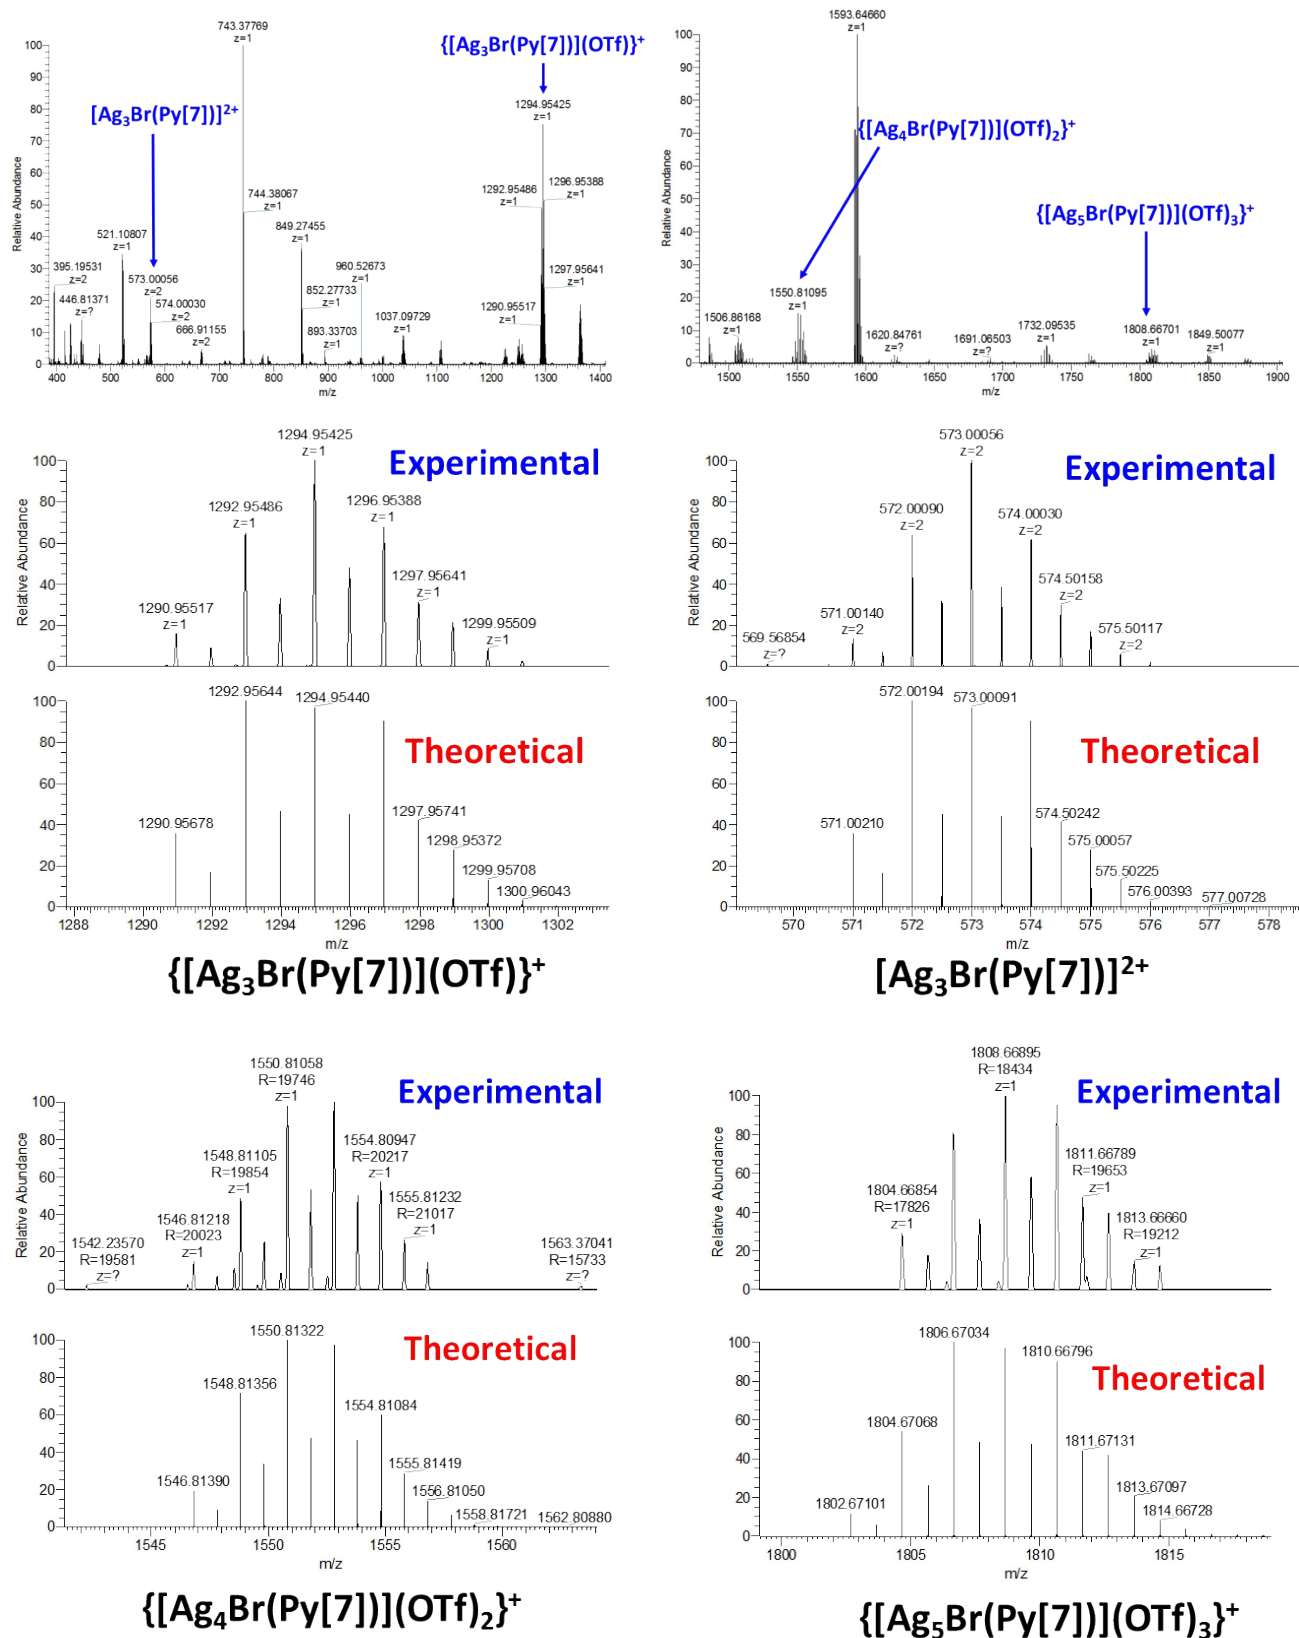

**Fig. S2** High resolution ESI-MS spectra of complex 2.

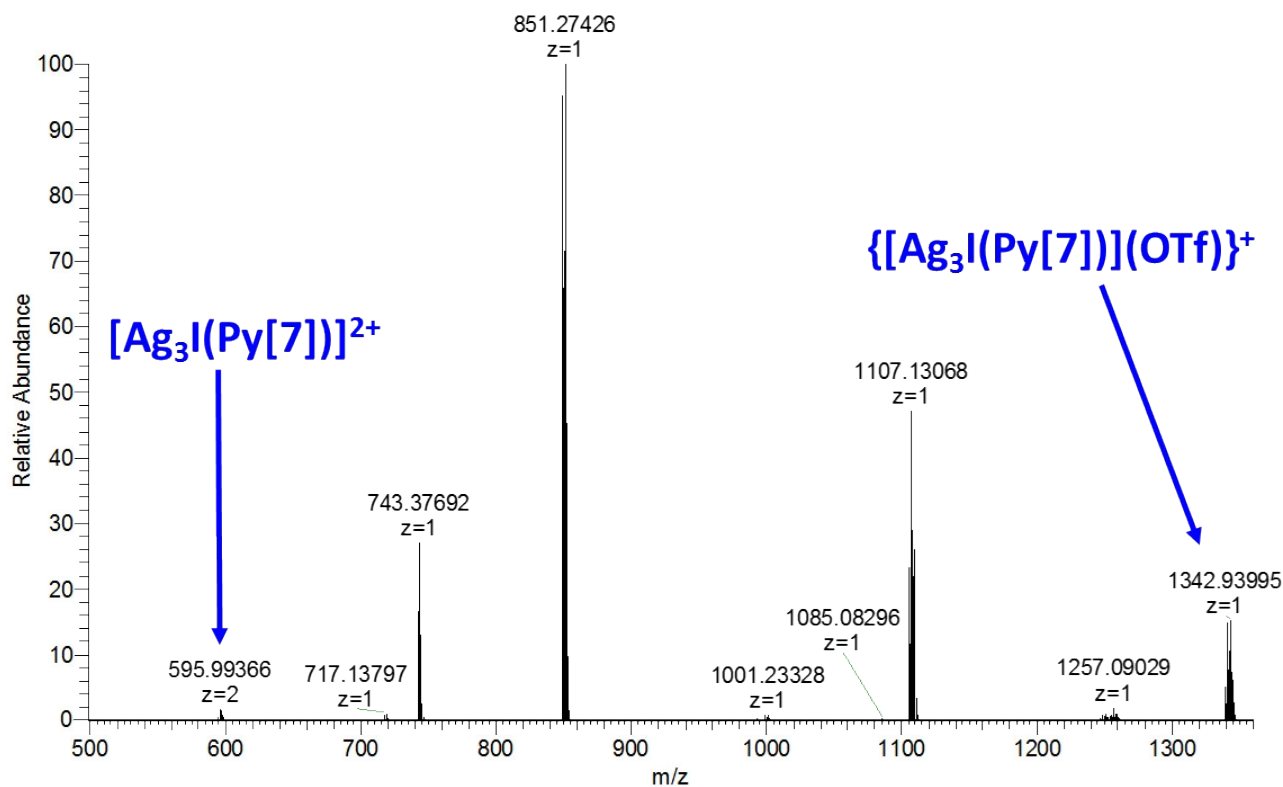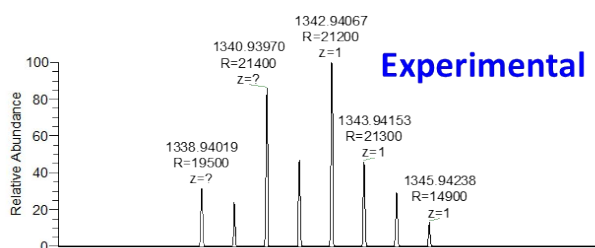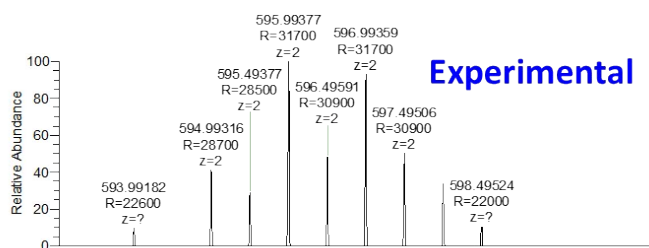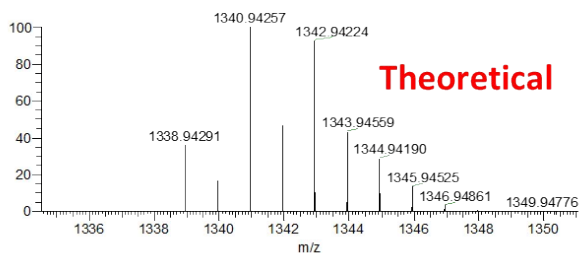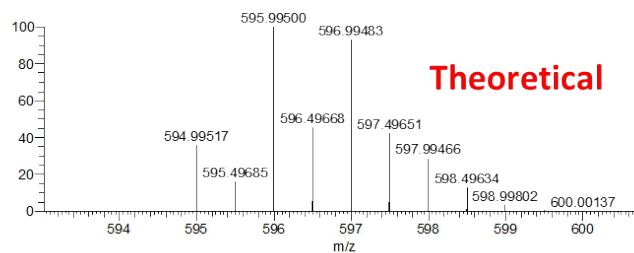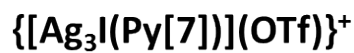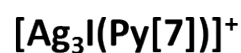

Fig. S3 High resolution ESI-MS spectra of complex 3.

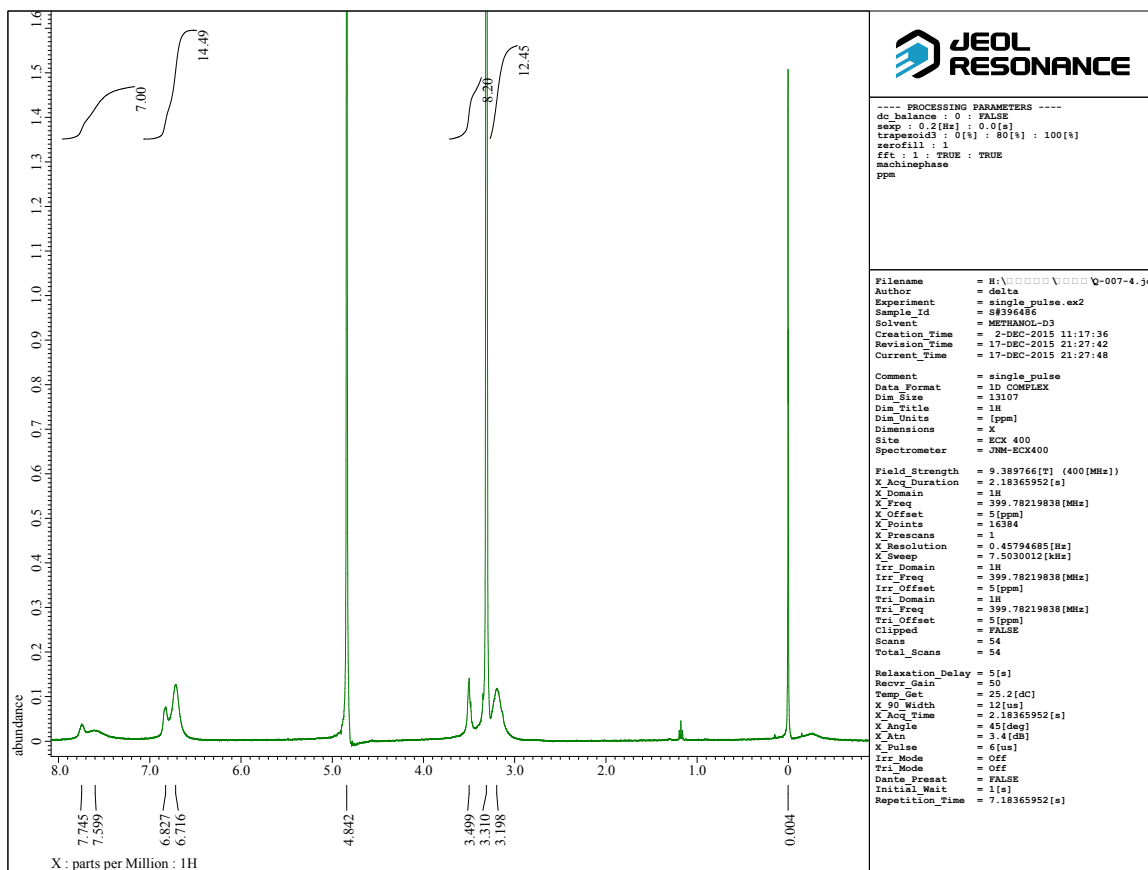

Fig. S4  $^1\text{H-NMR}$  spectrum (400MHz, methanol- $d_4$ :  $\text{CDCl}_3$ ,  $\nu$  :  $\nu = 1 : 1$ ) of complex 1.

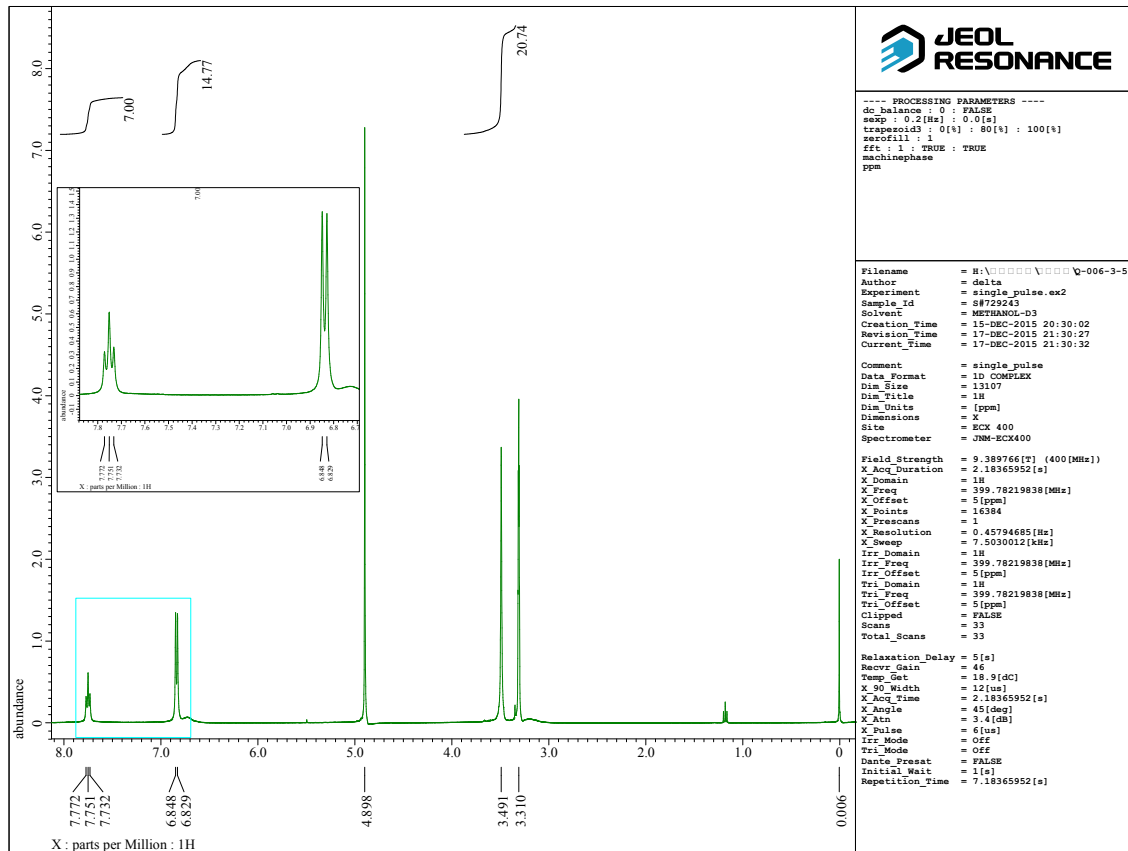

Fig. S5  $^1\text{H-NMR}$  spectrum (400MHz, methanol- $d_4$ :  $\text{CDCl}_3$ ,  $\nu$  :  $\nu = 1 : 1$ ) of complex 2.

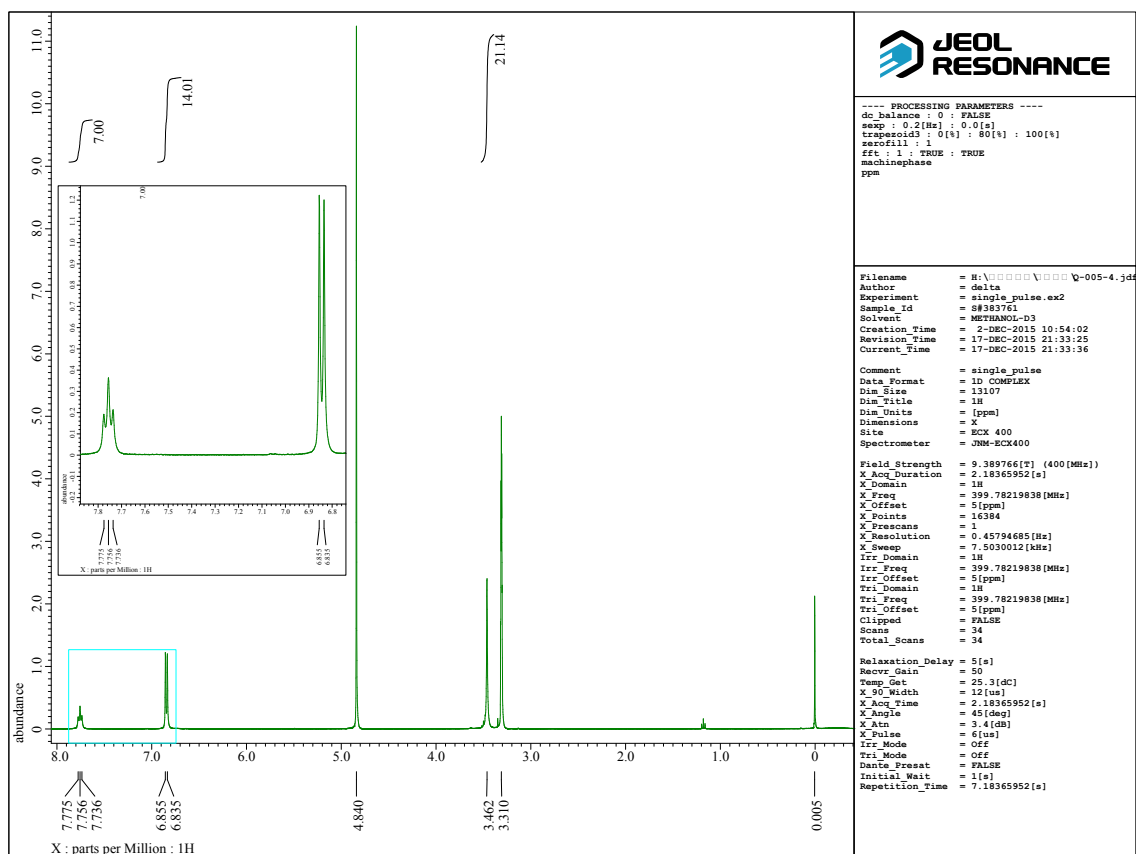

**Fig. S6**  $^1\text{H}$ -NMR spectrum (400MHz, methanol- $d_4$  :  $\text{CDCl}_3$ ,  $v : v = 1 : 1$ ) of complex **3**.

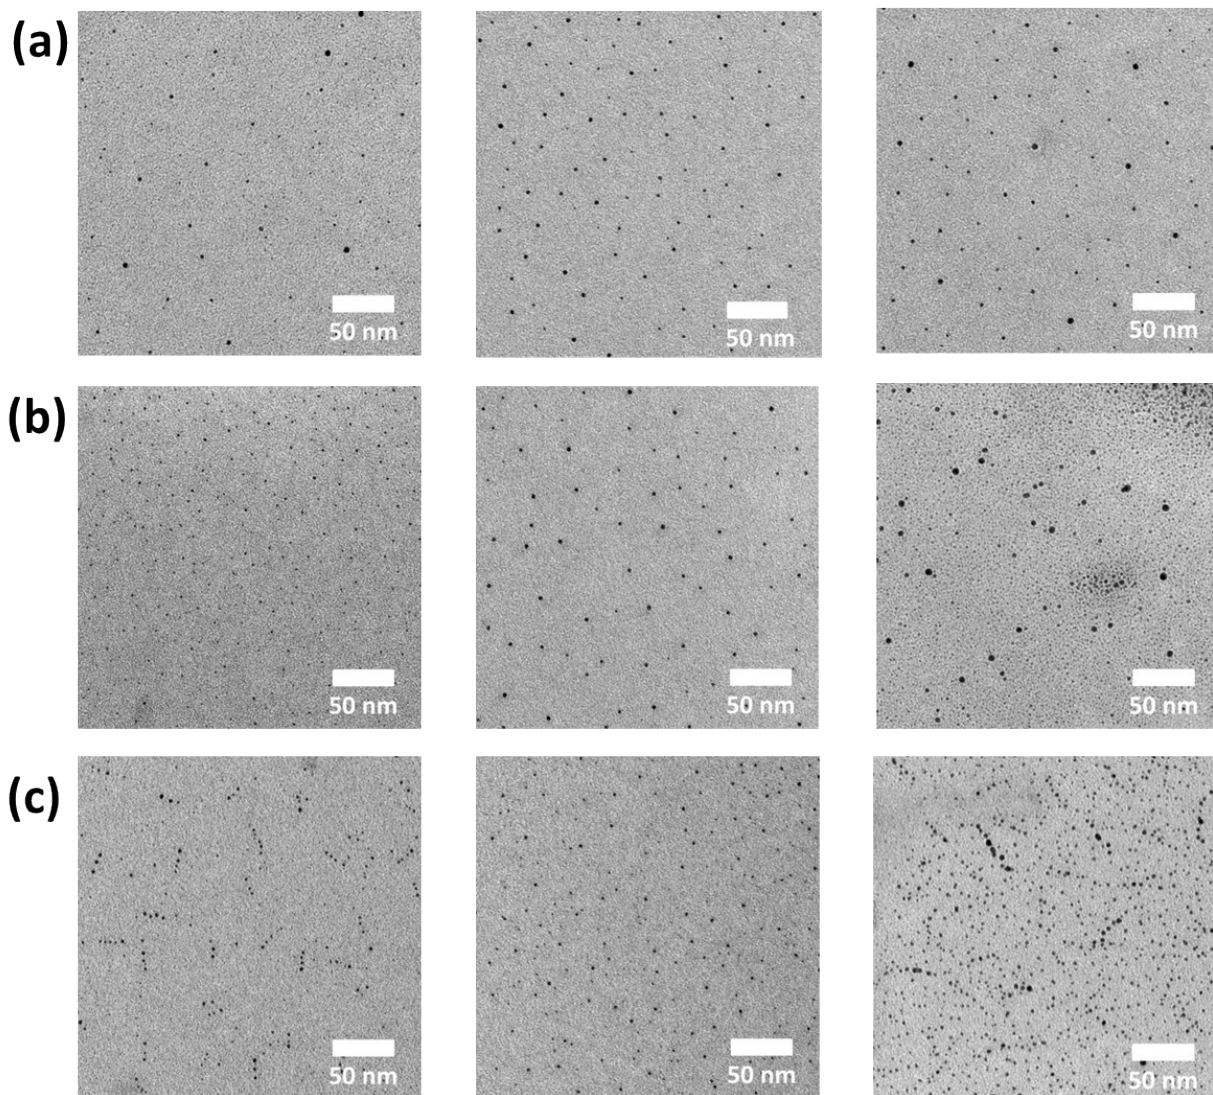

**Fig. S7** TEM images for the stepwise growth of nanometer-sized particles upon adding  $\text{HBF}_4$  into the solution of (a) complex **1**, (b) complex **2**, (c) complex **3**. From left to right: after 1, 2 and 3 minutes.



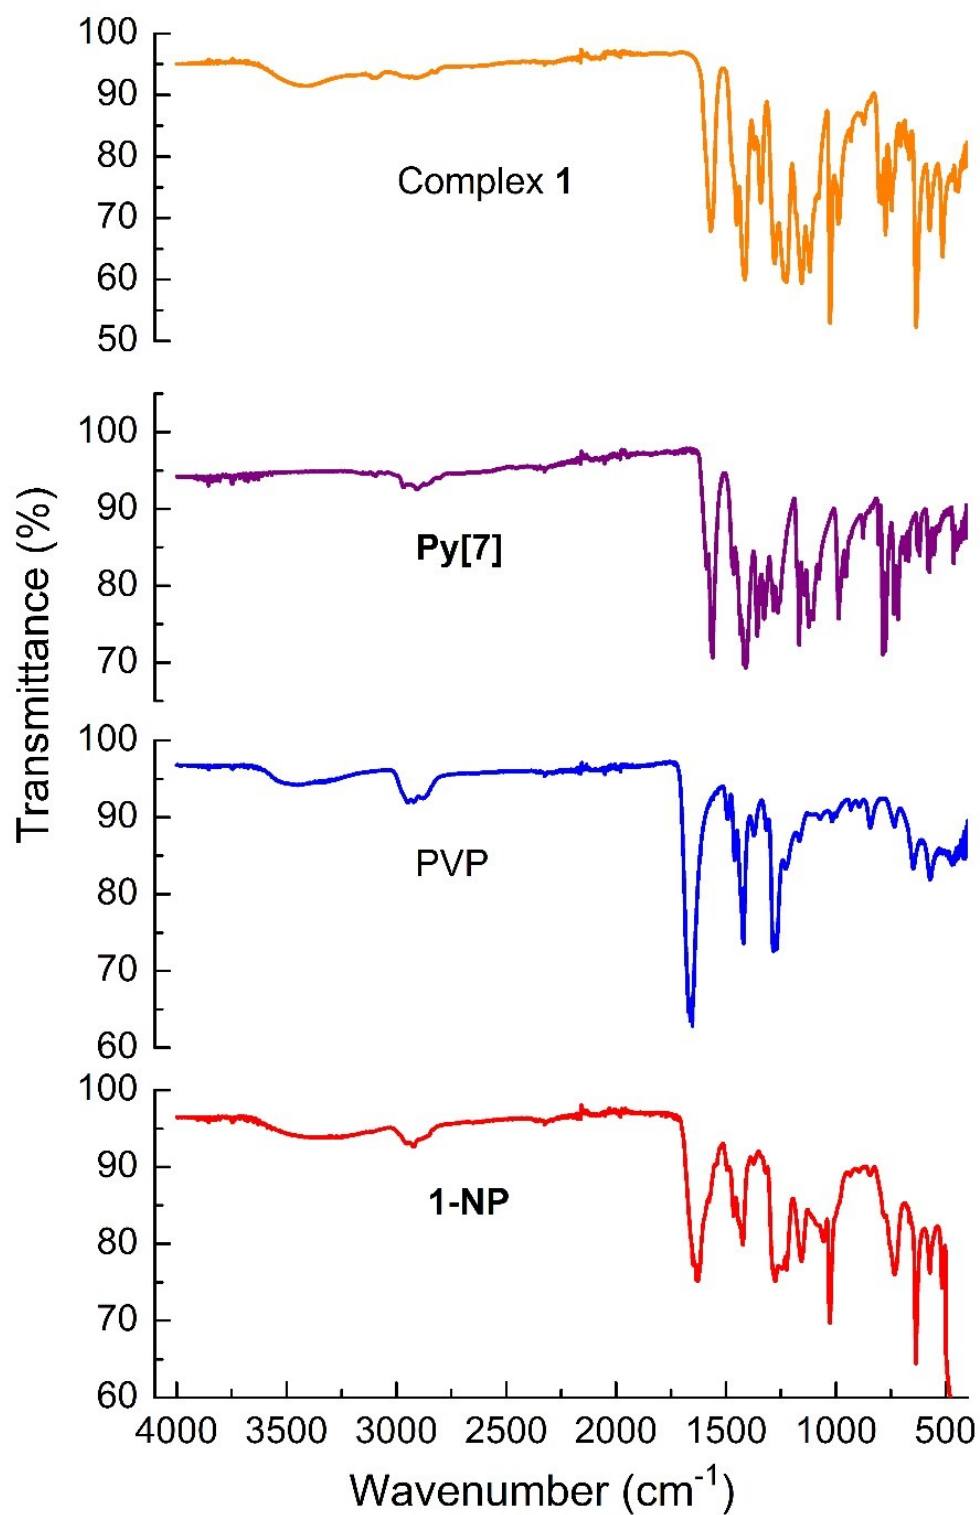

**Fig. S8** FT-IR spectra of 1-NP, PVP, macrocyclic ligand Py[7] and complex 1.

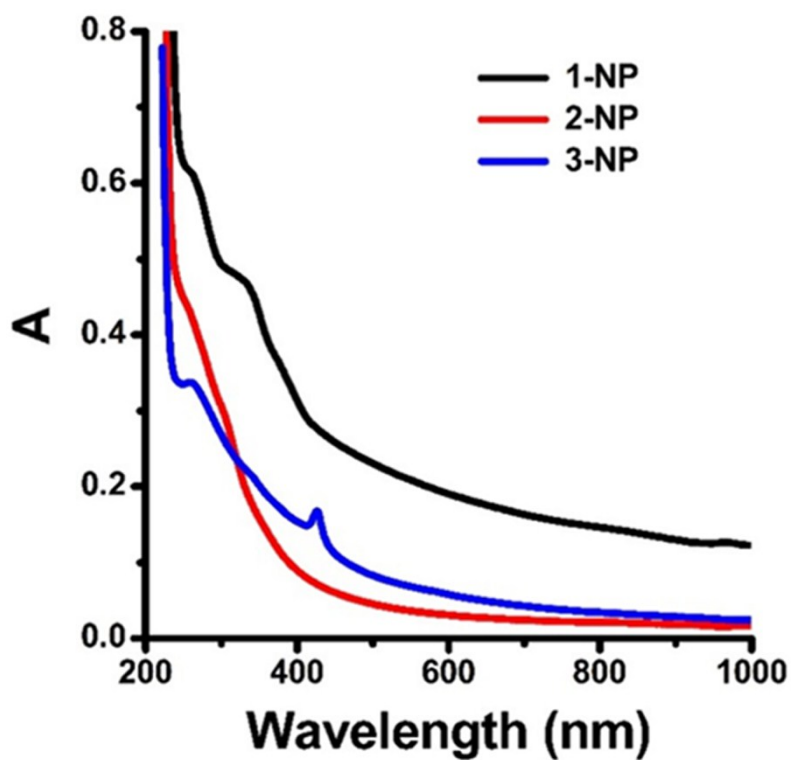

**Fig. S9** UV-vis spectra of 1- to 3-NP in methanol at 298 K.

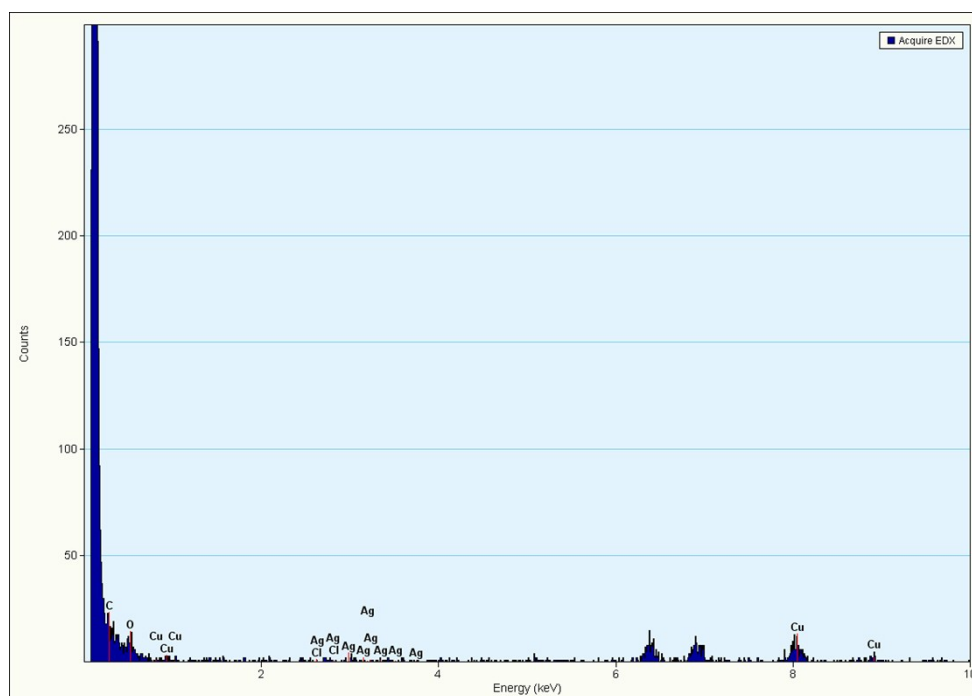

**Fig. S10** EDX spectrum of 1-NP. The Ag/Cl ratio was determined as 4.6 based on the atomic ratio of Ag-82.3% and Cl-17.7%.

| Element | Weight % | Atomic % | Uncert. % | Correction | k-Factor |
|---------|----------|----------|-----------|------------|----------|
| Cl(K)   | 6.60     | 17.71    | 4.65      | 0.95       | 1.063    |
| Ag(K)   | 93.39    | 82.28    | 42.56     | 0.98       | 6.491    |

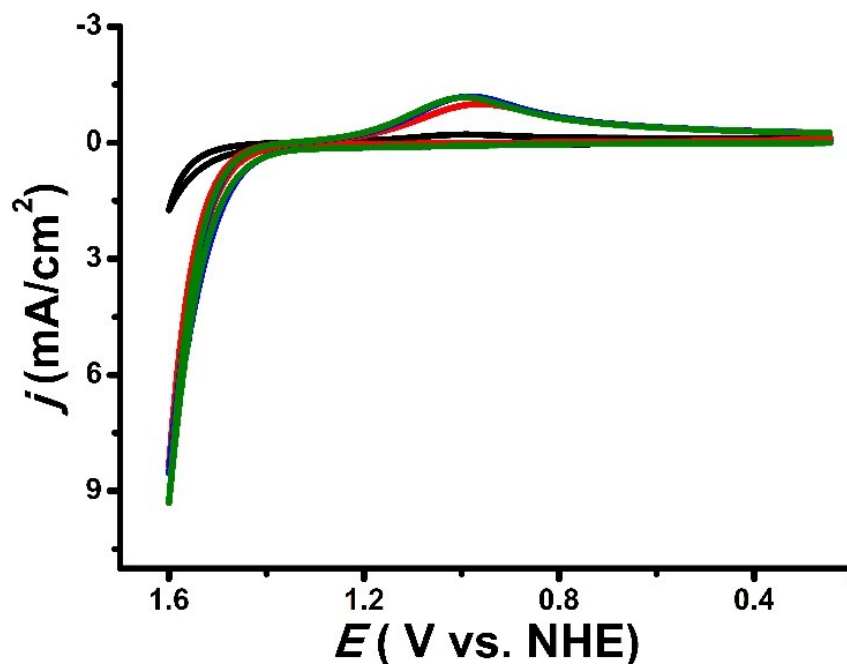

**Fig. S11** CVs at a GC electrode ( $0.071 \text{ cm}^2$ ) in an aqueous solution of NaCl (1 M) and  $\text{HNO}_3$  (pH  $\sim 1$ , 0.1 M) without (black) and with (red) 2-NP ( $c_{\text{Ag}^+} = 5.04 \text{ }\mu\text{M}$ ) and (green) 3-NP ( $c_{\text{Ag}^+} = 6.72 \text{ }\mu\text{M}$ ). Scan rate: 100 mV/s.

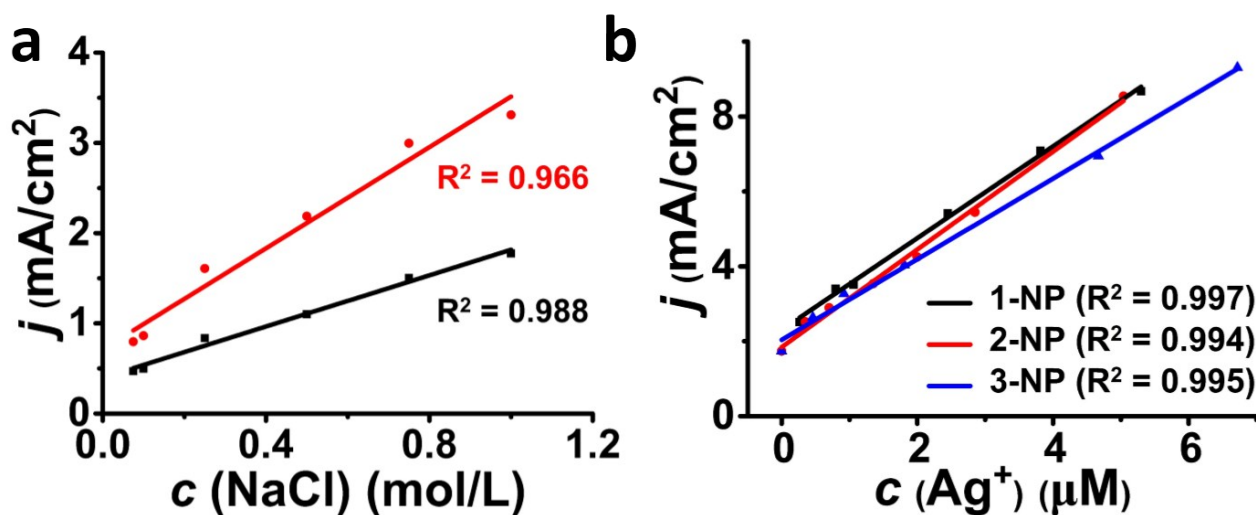

**Fig. S12** (a) Plot of catalytic current density vs. NaCl concentration in 0.1 M  $\text{HNO}_3$  solution without (black) and with (red) 1-NP ( $c_{\text{Ag}^+} = 0.53 \text{ }\mu\text{M}$ ). (b) Plot of catalytic current density vs. silver(I) concentration of 1-3-NP (1 M NaCl, 0.1 M  $\text{HNO}_3$ ).

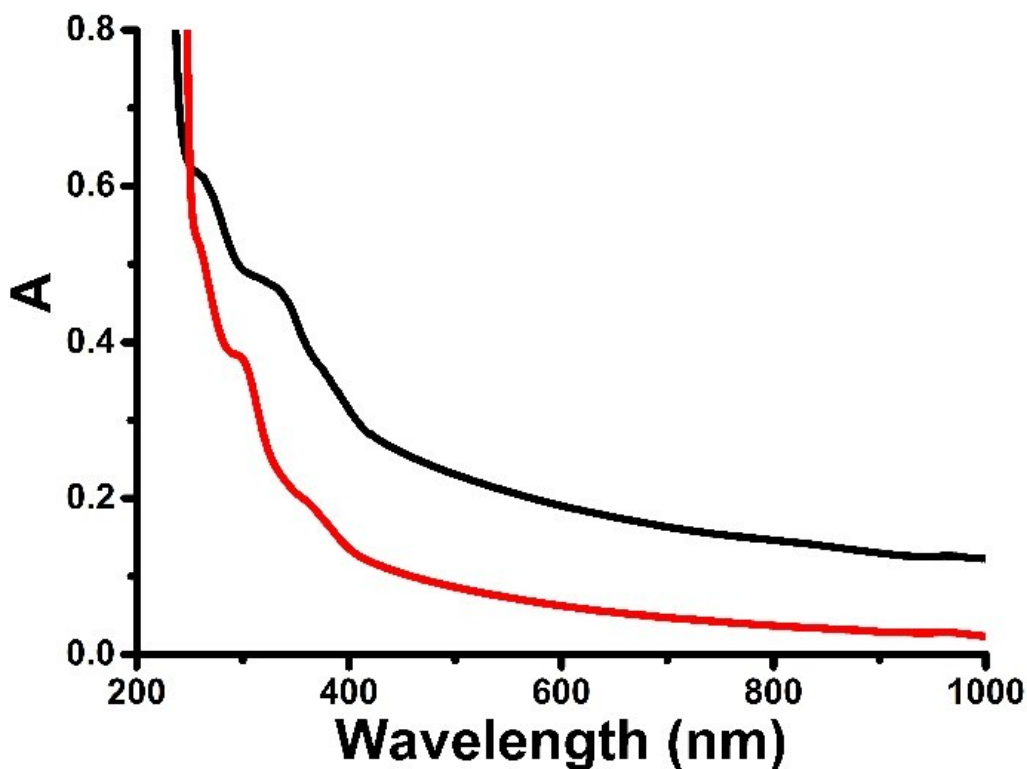

**Fig. S13** UV-vis spectra of 1-NP in (black) H<sub>2</sub>O and (red) in an aqueous solution of NaCl (1 M) and HNO<sub>3</sub> (0.1 M) at 298 K.

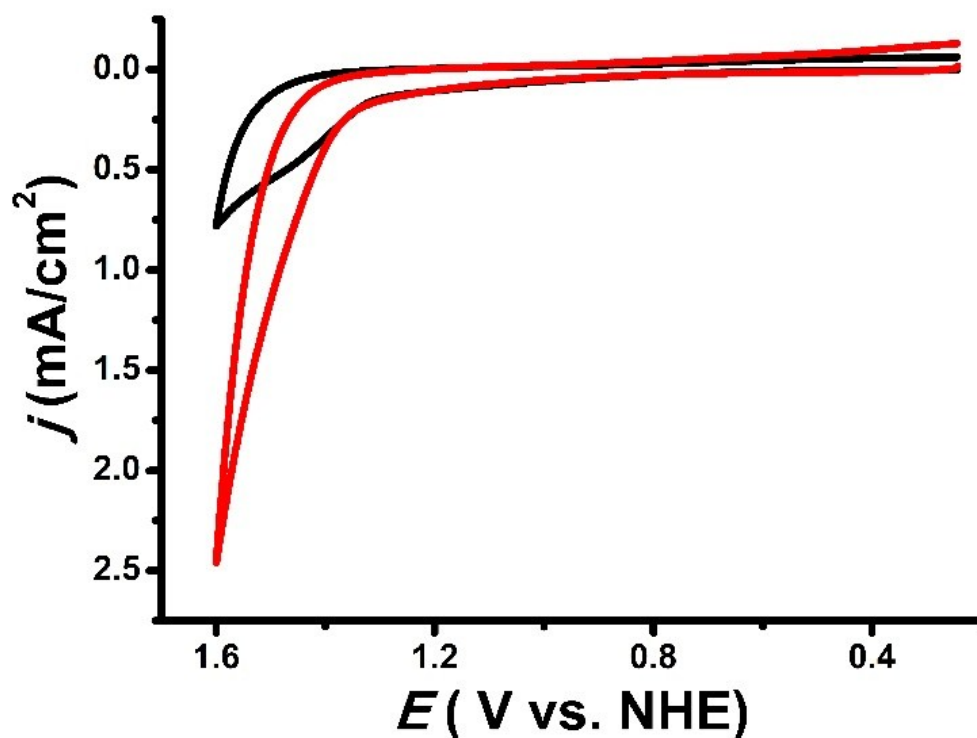

**Fig. S14** CVs of a glassy carbon electrode (0.071 cm<sup>2</sup>) in a NaH<sub>2</sub>PO<sub>4</sub>/Na<sub>2</sub>HPO<sub>4</sub> buffer solution (0.1 M, pH~7) of NaCl (0.55 M) without (black) and with (red) 1-NP (c<sub>Ag<sup>+</sup></sub> = 0.53 μM). Scan rate: 100 mV/s.

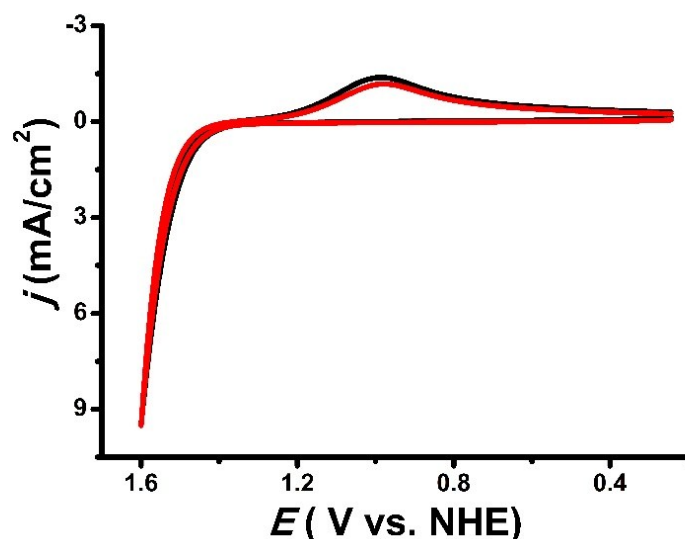

**Fig. S15** CVs of a glassy carbon electrode ( $0.071 \text{ cm}^2$ ) in an aqueous solution of NaCl (1 M) and  $\text{HNO}_3$  (pH  $\sim 1$ , 0.1 M) with **1-NP** ( $c_{\text{Ag}^+} = 5.30 \text{ } \mu\text{M}$ ) (black) before and (red) after electrolysis.

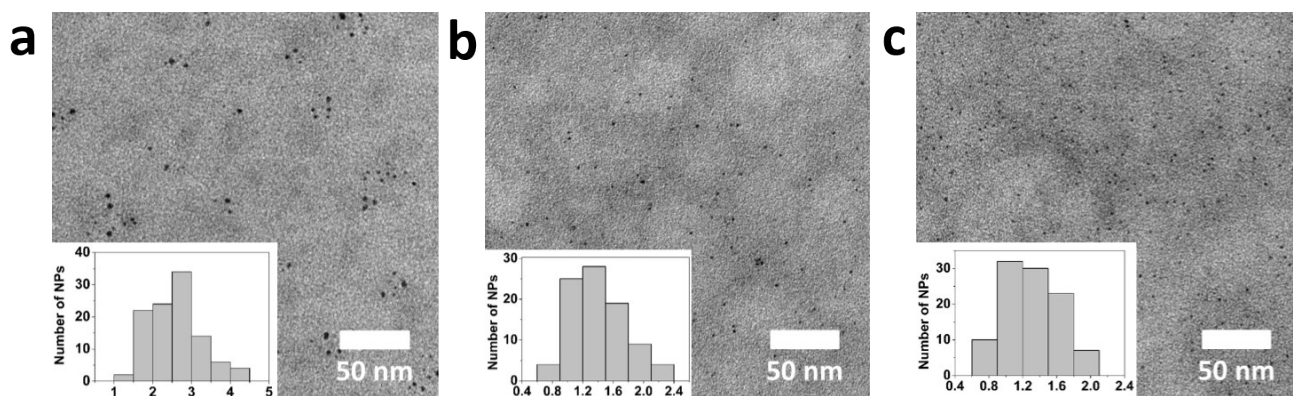

**Fig. S16** TEM images and size-distribution histograms of (a) **1-NP** ( $2.5 \pm 1.5 \text{ nm}$ ) in 0.05 M NaCl aqueous solution, (b) **2-NP** ( $1.5 \pm 0.9 \text{ nm}$ ) in 1 M NaCl aqueous solution, and (c) **3-NP** ( $1.4 \pm 0.7 \text{ nm}$ ) in 1 M NaCl aqueous solution.

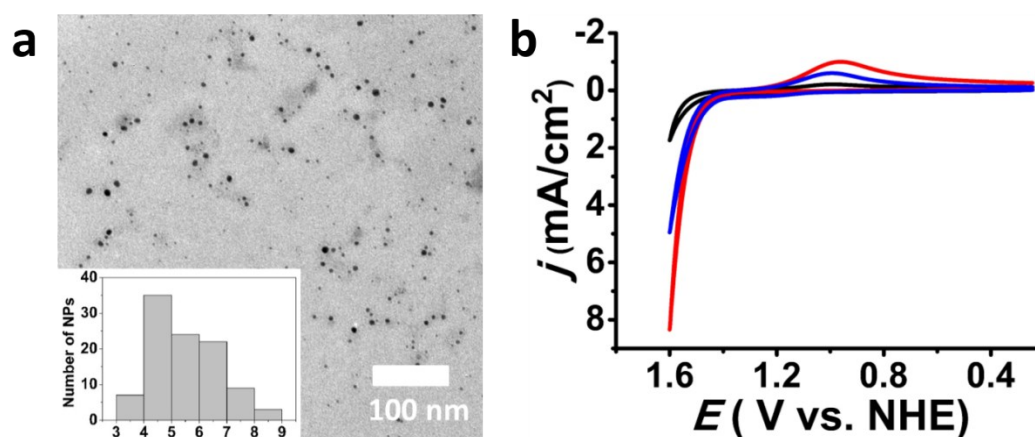

**Fig. S17** (a) TEM image and size-distribution histogram of **1-NP** in larger sizes ( $6.0 \pm 3.0 \text{ nm}$ ). (b) CVs at a GC electrode in an aqueous solution of NaCl (1 M) and  $\text{HNO}_3$  (pH  $\sim 1$ , 0.1 M) without (black) and with **1-NP** in  $2.5 \pm 1.5 \text{ nm}$  (red) and  $6.0 \pm 3.0 \text{ nm}$  (blue). Scan rate: 100 mV/s.

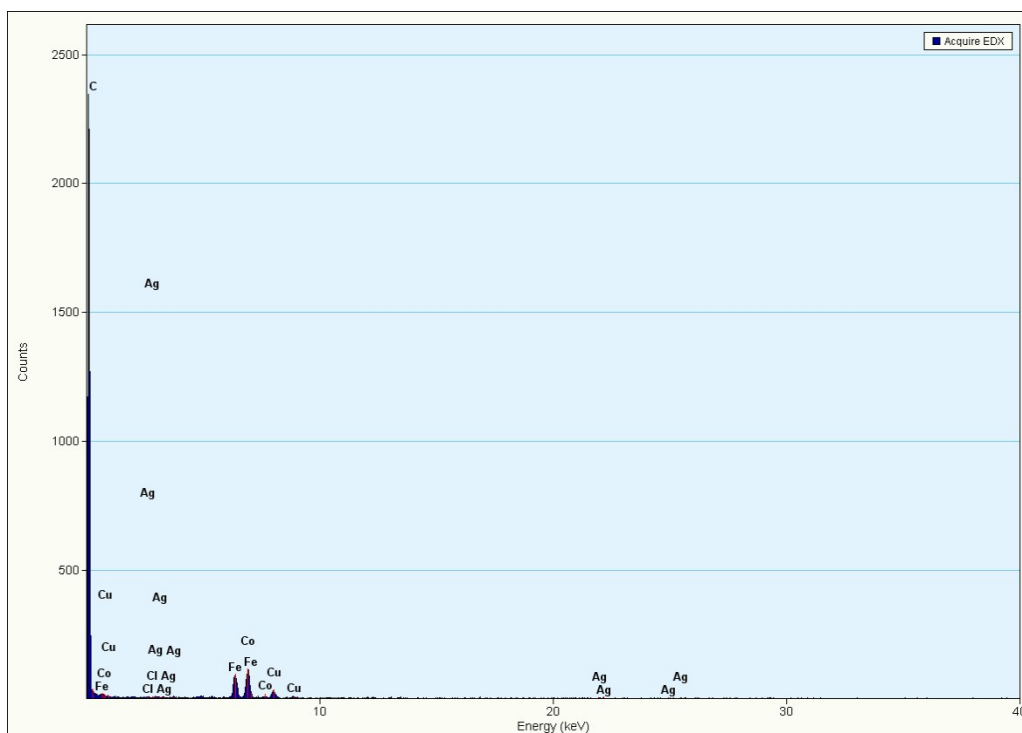

**Fig. S18** EDX spectrum of **1-NP** in 1M NaCl solution . The Ag/Cl ratio was determined as 1.1 based on the atomic ratio of Ag-51.9% and Cl-48.1%.

| Element | Weight % | Atomic % | Uncert. % | Correction | k-Factor |
|---------|----------|----------|-----------|------------|----------|
| Cl(K)   | 23.34    | 48.08    | 13.90     | 0.95       | 1.063    |
| Ag(L)   | 76.65    | 51.91    | 38.48     | 0.95       | 2.617    |

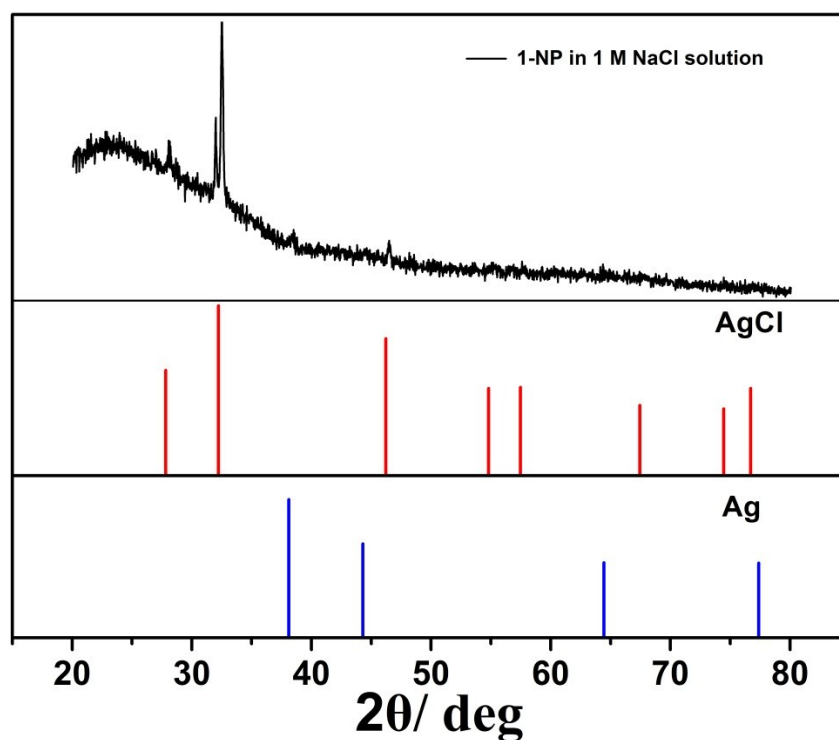

**Fig. S19** XRD patterns of **1-NP** in 1M NaCl solution and the reference AgCl (JCPDS file: 31-1238) and Ag (JCPDS file: 87-0597).

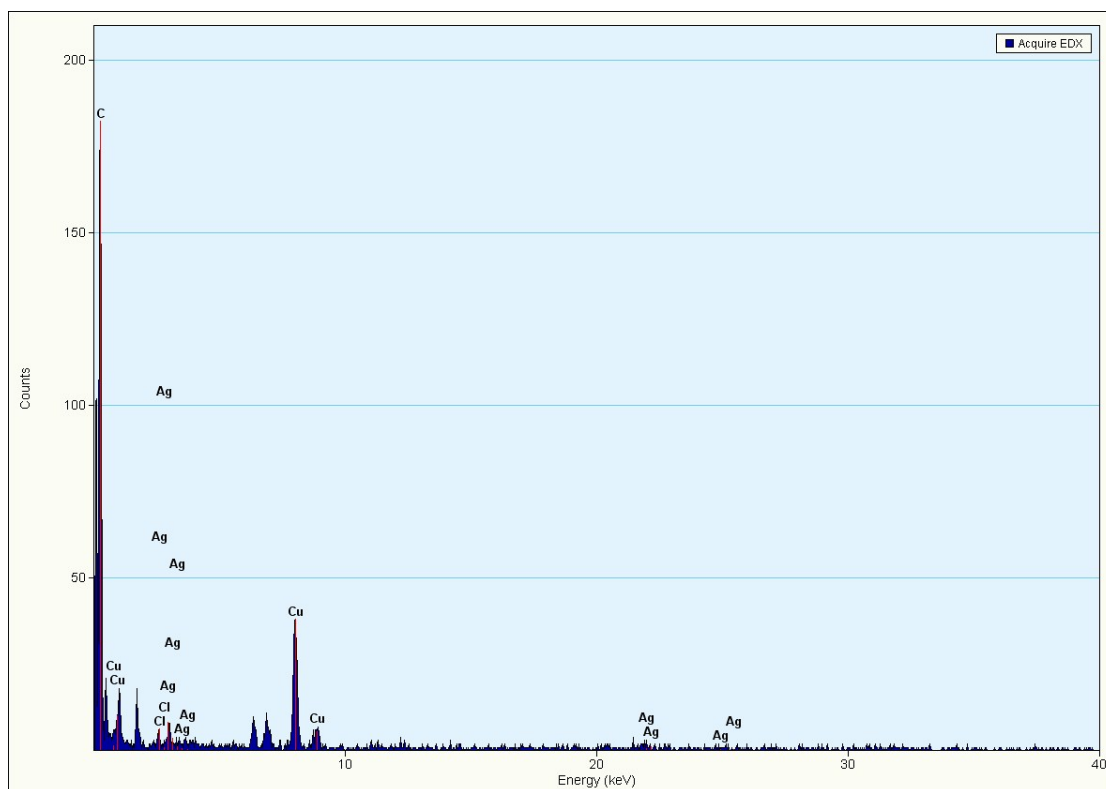

**Fig. S20** EDX spectrum of **1-NP** in 1M NaCl solution after 1h controlled potential electrolysis. The Ag/Cl ratio was determined as 3.7 based on the atomic ratio of Ag-78.8% and Cl-21.2%.

| Element | Weight % | Atomic % | Uncert. % | Correction | k-Factor |
|---------|----------|----------|-----------|------------|----------|
| Cl(K)   | 8.12     | 21.20    | 7.27      | 0.95       | 1.063    |
| Ag(L)   | 91.87    | 78.79    | 20.42     | 0.95       | 2.617    |

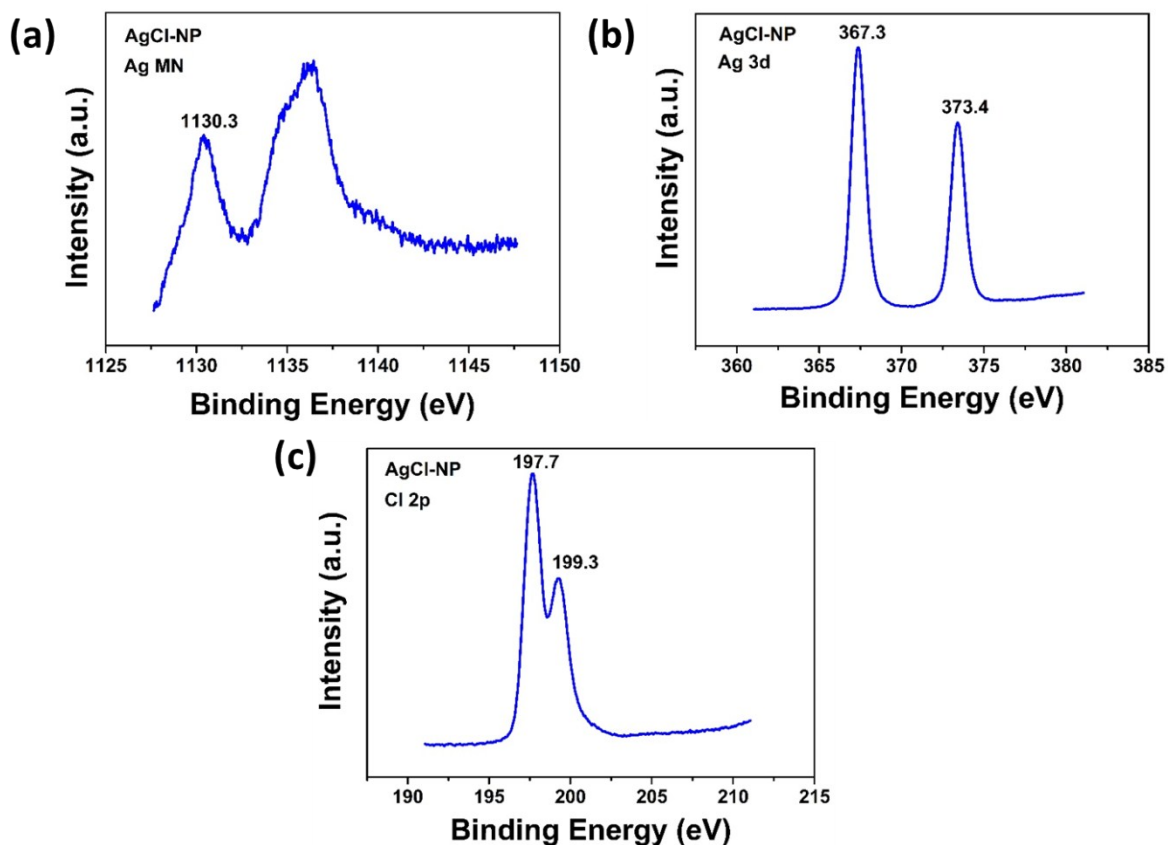

**Fig. S21** Ag MN, Ag 3d and Cl 2p signals for the PVP-stabilized stoichiometric AgCl nanoparticles AgCl-NP (C. An, S. Peng and Y. Sun, *Adv. Mater.*, 2010, **22**, 2570-2574). The Ag MN signals were determined by AES while the binding energies for Ag 3d and Cl 2p were measured by XPS. The +1 oxidation state of silver was determined based on the Ag 3d<sup>5/2</sup> and Ag 3d<sup>3/2</sup> binding energy peaks at 373.4 and 367.3 eV, respectively.
